# Supplementary figures and images for: Human leukocyte antigen selected allogeneic mesenchymal stromal cell therapy in renal transplantation: The Neptune study, a phase I single‐center study
Source: PubMed Central journal article supplement — Am J Transplant. 2020 May 6;20(10):2905–15. doi: 10.1111/ajt.15910 (PMC7586810; doi:10.1111/ajt.15910), 2020-05-06

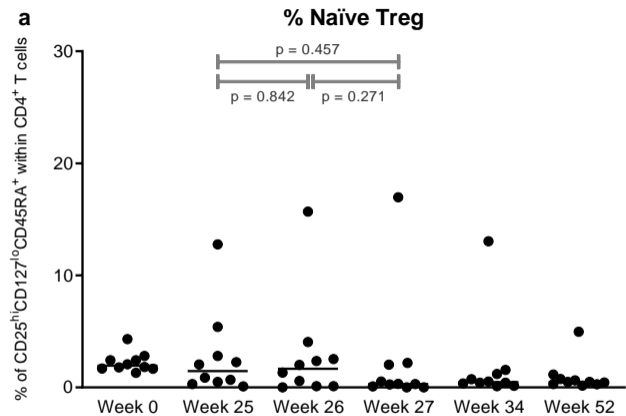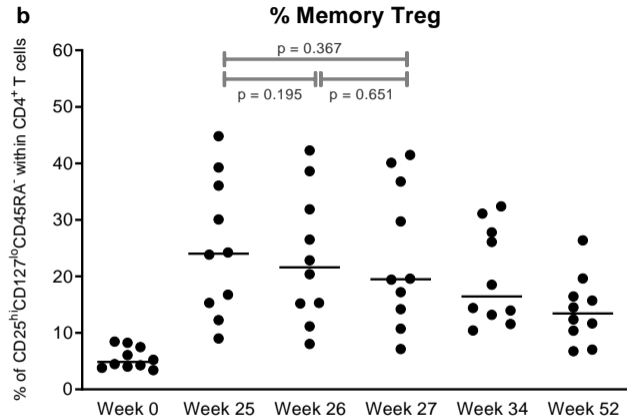

Figure S1

Supplement: AJT-20-2905-s001.pdf [file AJT-20-2905-s001.pdf]
